# Supplementary material
Source: Springer Nature journal article supplement (https://www.springermedizin.de/resource/supplementary/12970_2010_175_MOESM4_ESM.pdf/9594516)

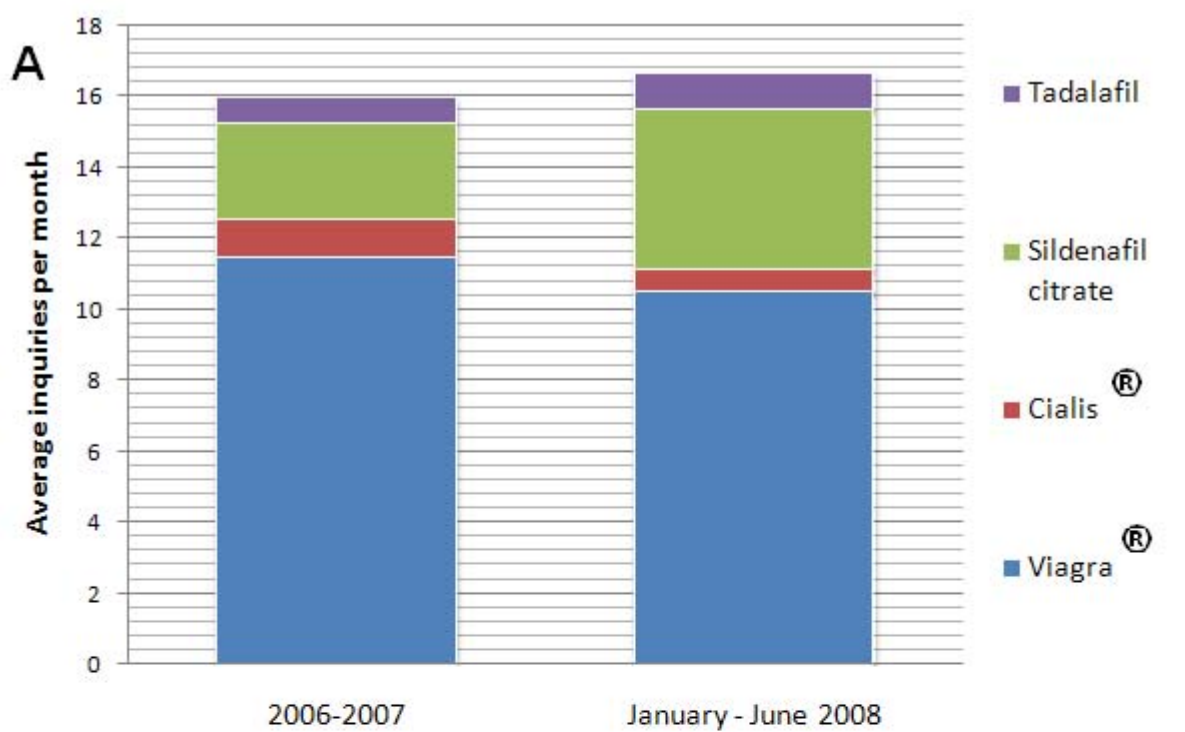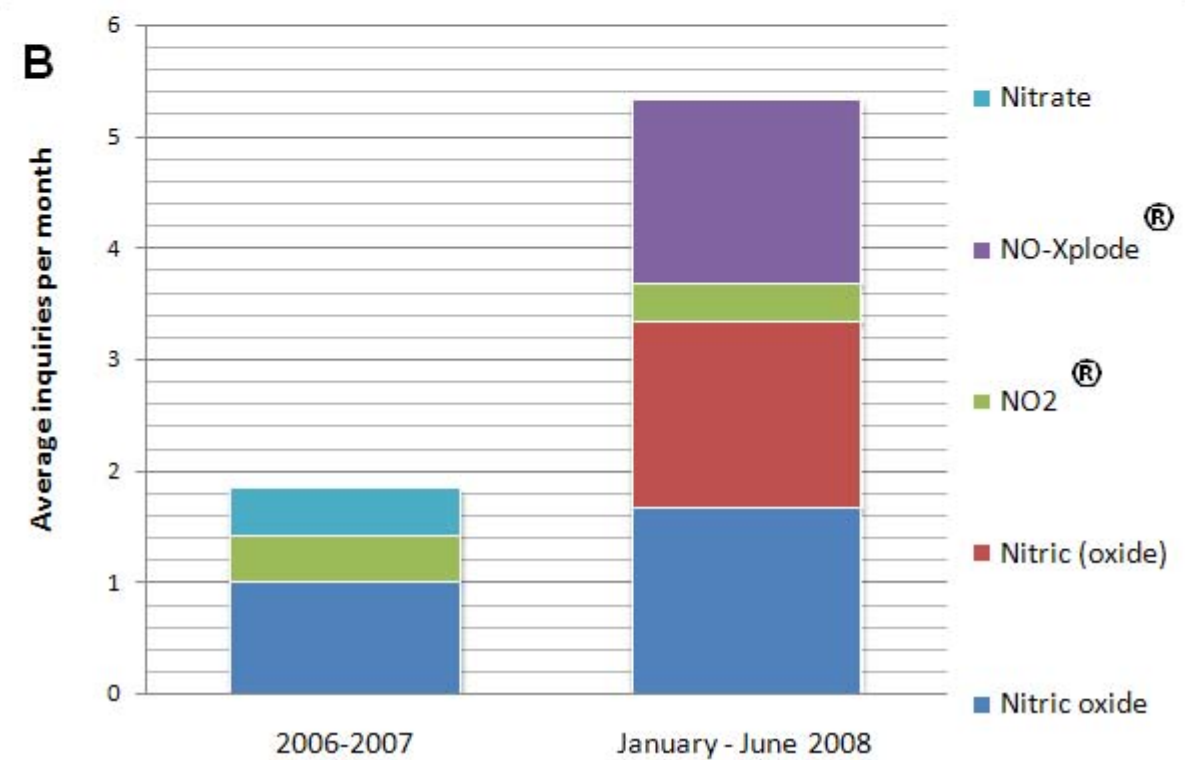

Supplement: MOESM4 [file 9594516]
